# Supplementary material for: Identification of Kaurane-Type Diterpenes as Inhibitors of Leishmania Pteridine Reductase I
Source: MDPI journal article supplement (doi:10.3390/molecules26113076), 2021-05-21
Supplement: s1 [file s1]

Article

# Identification of Kaurane-Type Diterpenes as Inhibitors of Leishmania Pteridine Reductase I

Chonny Herrera-Acevedo <sup>1,4</sup>, Areli Flores-Gaspar <sup>2,\*</sup>, Luciana Scotti <sup>1</sup>, Francisco Jaime Bezerra Mendonça-Junior <sup>3</sup>, Marcus Tullius Scotti <sup>1,\*</sup> and Ericsson Coy-Barrera <sup>2,4</sup>

<sup>1</sup> Post-Graduate Program in Natural and Synthetic Bioactive Products, Federal University of Paraíba, João Pessoa, PB 58051-900, Brazil; chonny622@gmail.com (C.H-A.); luciana.scotti@gmail.com (L.S.); mtscott@gmail.com (M.S)

<sup>2</sup> Departamento de Química, Facultad de Ciencias Básicas y Aplicadas, Universidad Militar Nueva Granada, Cajicá 250247, Colombia; areli.flores@unimilitar.edu.co (A.F-G.)

<sup>3</sup> Laboratory of Synthesis and Drug Delivery, State University of Paraíba, João Pessoa, Brazil; franciscojbmen-donca@yahoo.com.br (F.M-J)

<sup>4</sup> Bioorganic Chemistry Laboratory, Facultad de Ciencias Básicas y Aplicadas, Universidad Militar Nueva Granada, Cajicá 250247, Colombia; ericsson.coy@unimilitar.edu.co (E.C-B.)

\* Correspondence: mtscott@gmail.com, Tel.: +55-83-99869-0415 (M.S); areli.flores@unimilitar.edu.co Tel: +57 (1)-650-00-00 ext. 1526. (A.F-G.)

## Supplementary material

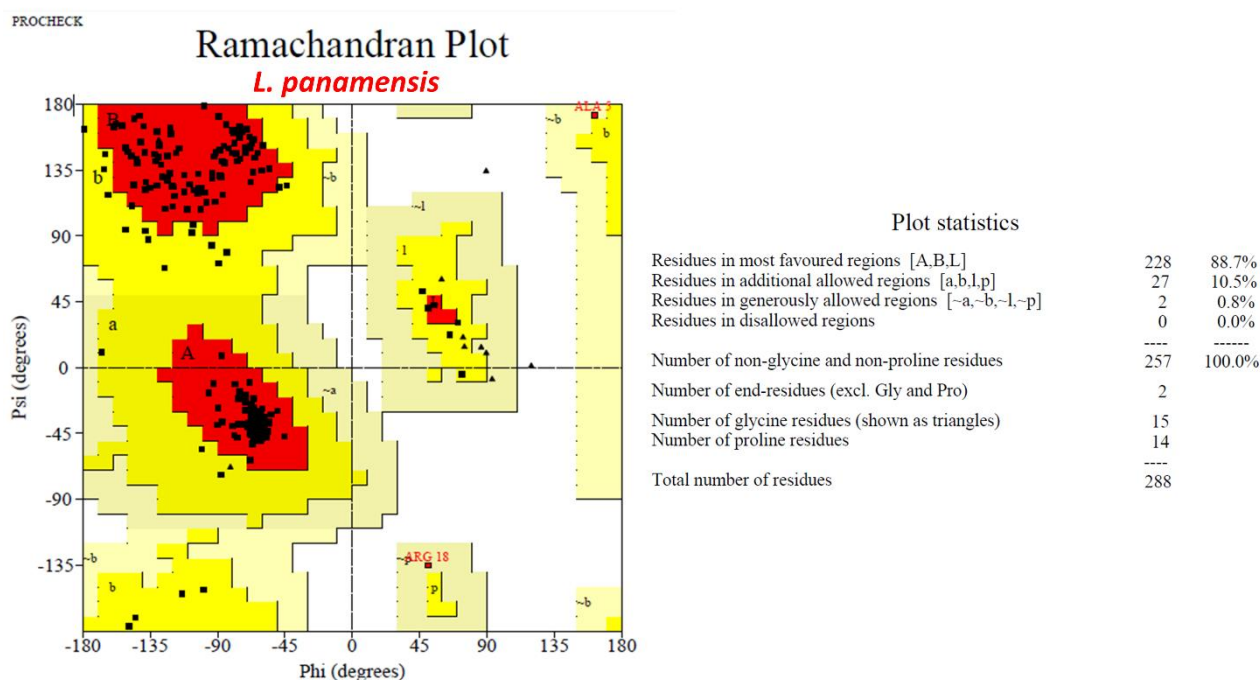

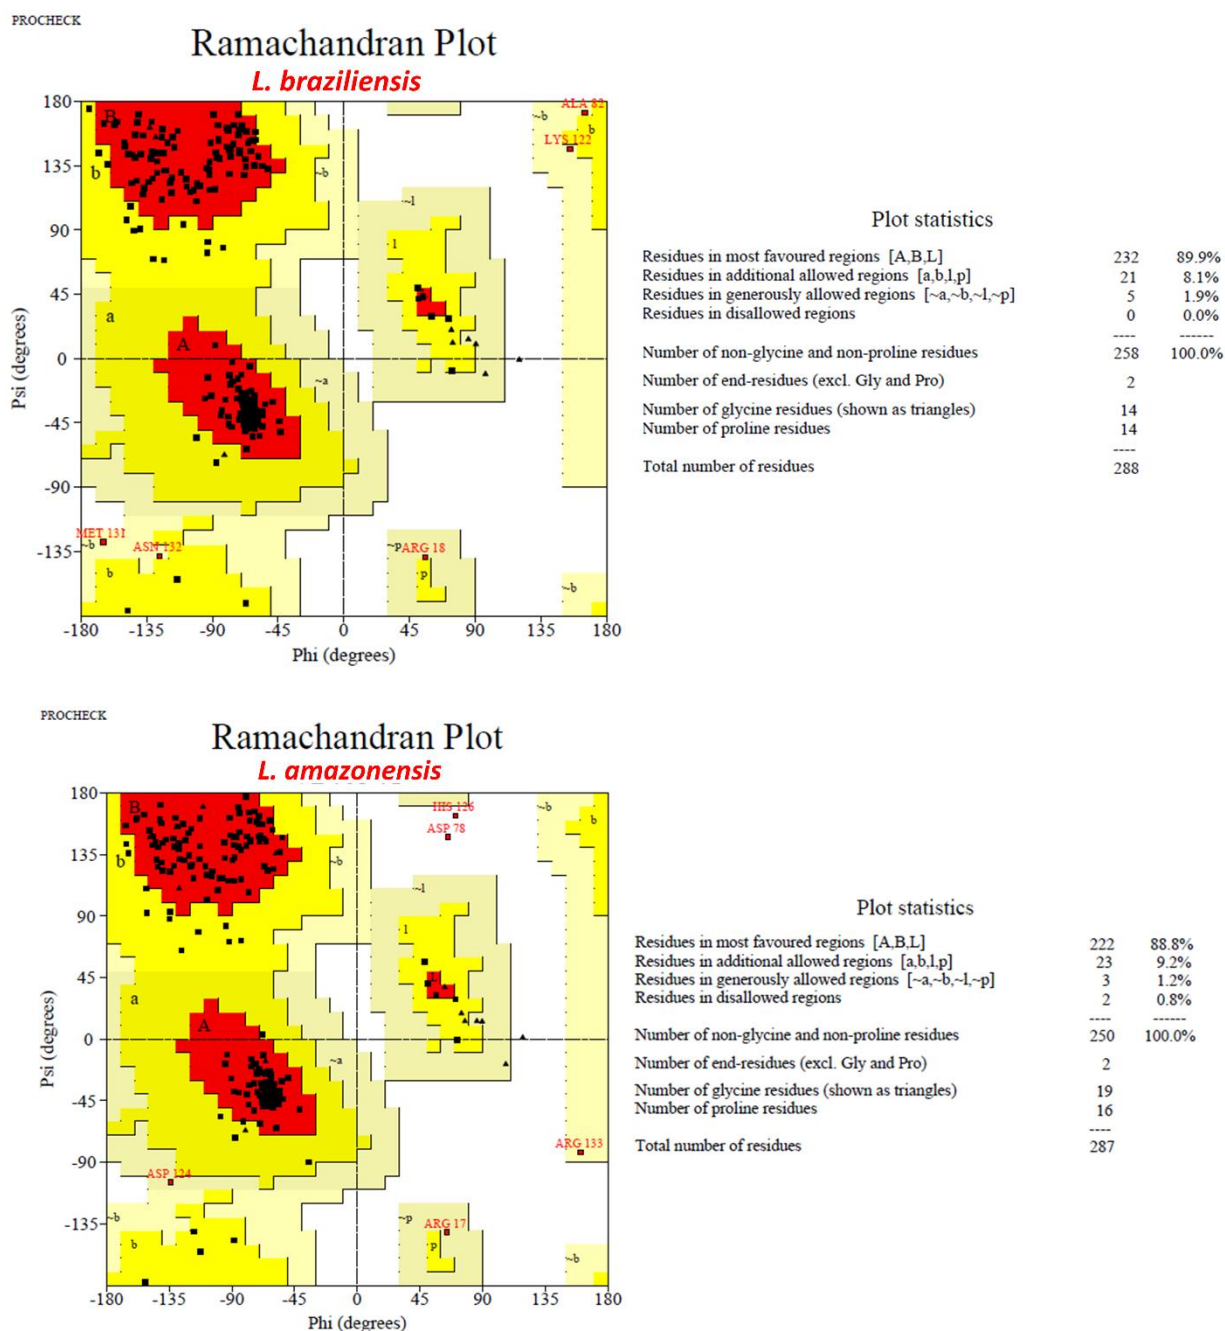

**Figure S1.** Ramachandran plots for hybrid models of *L. panamensis*, *L. braziliensis* and *L. amazonensis*.
